# Supplementary material
Source: PubMed Central journal article supplement (PMC1182240)
Supplement: 7600745s1.pdf [file 7600745s1.pdf]

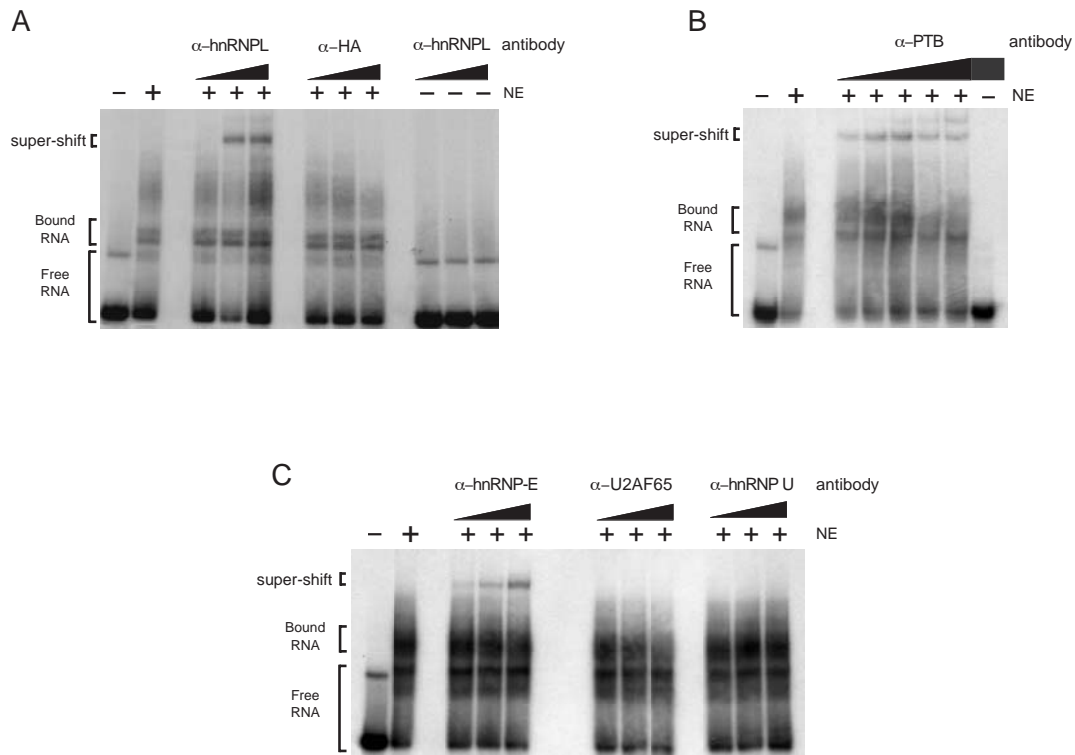

**Supplementary Fig. 1: HnRNPs L, E2 and PTB associate with ESS1 in native gel complexes.**

(A) Antibodies to hnRNP L retard migration of ESS1-bound complex in native gels. <sup>32</sup>P-labeled ESS1 RNA was incubated in the presence (+NE) or absence (-NE) of nuclear extract and increasing amounts (0.01, 0.1, 1 μl) of anti-hnRNP L (4D11, Abcam) or anti-HA (HA.11 Babco) and resolved on a non-denaturing polyacrylamide gel. (B) Native gel experiment as in panel A but with 0.03, 0.1, 0.3, 1 or 2 μl of antibodies specific to PTB (4856, rabbit polyclonal, gift of D. Black). (C) Native gel experiment as in panel A but with 0.1, 0.3 or 1 μl of antibody specific to hnRNP E (rabbit polyclonal, gift of R. Andino), hnRNP U (IQ210, Immunoquest) or U2AF65 (rabbit polyclonal, gift of T. Mantiatis). All supershift assays were conducted by adding antibody after the pre-incubation step specified in the Materials and Methods section.
